# Supplementary material for: A study on harmonizing total ozone assimilation with multiple sensors
Source: Copernicus journal article supplement (doi:10.5194/acp-19-9431-2019), 2019-07-24
Supplement: Supplementary file 1 [file acp-19-9431-2019-supplement.pdf]

Supplement of Atmos. Chem. Phys., 19, 9431–9451, 2019  
<https://doi.org/10.5194/acp-19-9431-2019-supplement>  
© Author(s) 2019. This work is distributed under  
the Creative Commons Attribution 4.0 License.

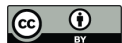

*Supplement of*

## **A study on harmonizing total ozone assimilation with multiple sensors**

**Yves J. Rochon et al.**

*Correspondence to:* Yves J. Rochon ([yves.rochon@canada.ca](mailto:yves.rochon@canada.ca))

The copyright of individual parts of the supplement might differ from the CC BY 4.0 License.

The supplemental material contains three complementary tables on comparisons of OMI and ground-based total column ozone measurements, followed by five complementary figures covering different topics.

Figures S4 and S5 and the text below describe the elements of the background ozone error covariances applied with the assimilation experiments. The two figures depict the background error horizontal and vertical correlations. The resultant horizontal correlation half widths at half maximum are ~125 km near the surface and increase from ~165 km at 100 hPa to just under 750 km at 1 hPa. The vertical correlations have half width at half maximum values between 0.5 and 1 km between the top of the boundary layer and 100 hPa, and are nearly equal the model vertical resolutions above 100 hPa with values ranging from ~0.5 km at 100 hPa to ~3.5 km at 1 hPa.

The background error correlations for ozone were obtained as follows. The third order autoregressive correlation model (TOAR; Gaspari and Cohn, 1995) was applied to globally homogeneous, isotropic, and separable horizontal and vertical error correlations obtained from a spectral space representation. The initial correlations were calculated using monthly six-hour time differences of the free running GEM-LINOZ model as proxy to six-hour forecast errors (Polavarapu et al., 2005; Jackson et al., 2008; Section 5.5 in Bannister, 2008). Smoothing was applied to the vertical level-dependent set of derived error correlation half widths at half maxima of the TOAR functions.

The applied monthly background ozone error standard deviations vary with latitude and vertical level. They were obtained from a single iteration of the Desroziers et al. (2005) approach with an assimilation of the Microwave Limb Sounder (MLS) data (Waters et al., 2006; Livesey et al., 2006, 2013; Froidevaux et al., 2008) applied following originally assigned ozone background error standard deviations of 5 % in the stratosphere and upper troposphere. The resulting values at sample vertical levels of 1, 10, 50, and 300 hPa in the ranges of ~6-12 %, ~3-5 %, ~5-15 %, and ~15-24 %, respectively. Constant extrapolation in absolute value uncertainty was imposed for lower tropospheric levels with resultant percentage values being ~15-16 % of the Fortuin and Kelder (1998) climatology in volume mixing ratio.

## References

- Bannister, R. N.: A review of forecast error covariance statistics in atmospheric variational data assimilation. I: Characteristics and measurements of forecast error covariances, *Q. J. R. Meteorol. Soc.* 134, 1951–1970, <https://doi.org/10.1002/qj.339>, 2008.
- Desroziers, G., Berre, L., Chapnik, B., and Poli, P.: Diagnosis of observation, background, and analysis-error statistics in observation space, *Q. J. R. Meteorol. Soc.*, 131, 3385-3396, <https://doi.org/10.1256/qj.05.108>, 2005.
- Fortuin, J. P., and Kelder, H.: An ozone climatology based on ozonesonde and satellite measurements, *J. Geophys. Res.*, 103, 31,709-31,734, <https://doi.org/10.1029/1998JD200008>, 1998.

- Froidevaux, L., and Coauthors: Validation of Aura Microwave Limb Sounder stratospheric ozone measurements, *J. Geophys. Res.*, 113, D15S20, <https://doi.org/10.1029/2007JD008771>, 24 pp., 2008.
- Gaspari, G., and Cohn, S.: Construction of correlation functions in two and three dimensions, *Q. J. R. Meteorol. Soc.*, 125, 723-757, <https://doi.org/10.1002/qj.49712555417>, 1995.
- Jackson, D.R., Keil, M., and Devenish, B.J.: Use of Canadian Quick covariances in the Met Office data assimilation system, *Q. J. R. Meteorol. Soc.*, 14, 1567-1582. <https://doi.org/10.1002/qj.294>, 2008.
- Livesey, N. J., Van Snyder, W., Read, W. J., and Wagner, P. A.: Retrieval algorithms for the EOS Microwave Limb Sounder (MLS), *IEEE Trans. Geosci. Remote Sens.*, 44, 1144–1155, <https://doi.org/10.1109/TGRS.2006.872327>, 2006.
- Livesey, N. J., and Coauthors: Earth Observing System (EOS) Aura Microwave Limb Sounder (MLS): Version 3.3 and 3.4 Level 2 data quality and description document, JPL D-33509, Version 3.3x/3.4x-1.1, Jet Propulsion Laboratory, 158 pp., May 14, 2013. [Available from: [http://mls.jpl.nasa.gov/data/v3\\_data\\_quality\\_document.pdf](http://mls.jpl.nasa.gov/data/v3_data_quality_document.pdf), last access: 17 July 2019]
- Polavarapu, S., Ren, S., Rochon, Y., Sankey, D., Ek, N., Koshyk, J., and Tarasick, D.: Data assimilation with the Canadian Middle Atmosphere Model, *Atmos.-Ocean*, 43, 77-100, <https://doi.org/10.3137/ao.430105>, 2005.
- Waters, J. W., and Coauthors: The Earth Observing System Microwave Limb Sounder (EOS MLS) on the Aura satellite, *IEEE Trans. Geosci. Remote Sens.*, 44, 1075–1092, <https://doi.org/10.1109/TGRS.2006.873771>, 2006.

| Region                      | Station name         | WMO ID <sup>+</sup> | Latitude (deg) | Longitude (deg) | Elevation (m)            | Mean differences (%) [# of points] |                          |                          |
|-----------------------------|----------------------|---------------------|----------------|-----------------|--------------------------|------------------------------------|--------------------------|--------------------------|
|                             |                      |                     |                |                 |                          | Summer 2014                        | Summer 2015              | Winter 2015              |
| North America and Greenland | Alert                | 018                 | 82.45          | -62.51          | 220                      | 0.65 [47]                          | -0.49 [43]               |                          |
|                             | Edmonton             | 021                 | 53.55          | -114.11         | 752                      | 2.34 [53]                          | <sup>^</sup> 2.60 [103]  | <sup>^</sup> 1.12 [73]   |
|                             | Resolute             | 024                 | 74.71          | -94.97          | 68                       | 0.56 [36]                          | <sup>^</sup> 0.35 [102]  |                          |
|                             | Toronto              | 065                 | 43.78          | -79.47          | 202                      | 0.99 [53]                          |                          |                          |
|                             | Goose Bay            | 076                 | 53.31          | -60.36          | 26                       | <sup>^</sup> 0.72 [62]             | <sup>^</sup> 1.94 [92]   | <sup>^</sup> 0.21 [63]   |
|                             | Churchil             | 077                 | 58.74          | -94.07          | 26                       | 0.81 [50]                          | -0.31 [95]               | 0.85 [52]                |
|                             | Saturna Island       | 290                 | 48.78          | -123.13         | 202                      | 1.74 [53]                          | <sup>^</sup> 1.05 [102]  | 0.94 [50]                |
|                             | Eureka               | 315                 | 79.99          | -85.93          | 8                        | -0.61 [53]                         | <sup>^</sup> -1.32 [104] |                          |
|                             | Bondville            | 357                 | 40.05          | -88.37          | 213                      | -0.26 [8]                          | 0.67 [46]                | -0.52 [25]               |
|                             | Boulder              | 424                 | 40.13          | -105.24         | 1689                     | <sup>^</sup> 0.18 [150]            | <sup>^</sup> 1.41 [137]  | -0.20 [96]               |
|                             | Raleigh              | 461                 | 35.73          | -78.68          | 272                      | <sup>^</sup> 4.34 [4]              | 3.14 [46]                | 0.79 [32]                |
|                             | Fort Peck            | 362                 | 48.31          | -105.10         | 634                      |                                    | 3.50 [46]                | 1.97 [37]                |
|                             | Houston              | 484                 | 29.72          | -95.34          | 64                       |                                    | 0.12 [44]                | -1.23 [27]               |
|                             | Rocky Mountain       | 392                 | 40.03          | -105.53         | 2923                     | 2.14 [53]                          | <sup>*</sup> 4.03 [49]   | -1.93 [35]               |
| Sondrestrom                 | 267                  | 67.00               | -50.62         | 300             | -1.42 [51]               | -1.38 [55]                         | -2.38 [2]                |                          |
| Europe and Africa           | Uccle                | 053                 | 50.80          | 4.35            | 100                      | <sup>^</sup> -0.87 [134]           |                          |                          |
|                             | Hradec Kralove       | 096                 | 50.18          | 15.84           | 285                      | <sup>^</sup> -0.87 [106]           | <sup>^</sup> -1.21 [81]  | -0.17 [28]               |
|                             | Hohenpeissenberg     | 099                 | 47.81          | 11.01           | 975                      | 0.59 [47]                          | 0.53 [50]                | 0.91 [40]                |
|                             | Oslo                 | 165                 | 59.94          | 10.72           | 90                       | -0.93 [54]                         | -1.28 [48]               | -1.72 [10]               |
|                             | Norrkoeping          | 279                 | 58.58          | 16.15           | 43                       | -2.40 [56]                         | -2.35 [28]               | -0.40 [15]               |
|                             | Vindeln              | 284                 | 64.24          | 19.77           | 225                      | -0.22 [49]                         | 1.08 [24]                | -0.13 [7]                |
|                             | Valentia Observatory | 318                 | 51.93          | -10.25          | 14                       | <sup>^</sup> 1.72 [103]            | 1.88 [49]                | 0.94 [35]                |
|                             | Poprad-Ganovce       | 331                 | 49.03          | 20.32           | 706                      | -0.99 [42]                         | -0.42 [52]               | -0.44 [29]               |
|                             | Thessaloniki         | 261                 | 40.52          | 22.97           | 50                       | -0.49 [45]                         | -0.58 [48]               | -1.85 [24]               |
|                             | Kislovodsk           | 282                 | 43.73          | 42.66           | 2070                     | 2.79 [48]                          | 2.42 [42]                | -1.03 [44]               |
|                             | Rome                 | 305                 | 41.90          | 12.50           | 75                       | -0.23 [55]                         | 0.33 [44]                | 0.77 [38]                |
|                             | Obninsk              | 307                 | 55.10          | 36.61           | 100                      | -1.07 [57]                         | -1.09 [52]               | -0.76 [14]               |
|                             | De Bilt              | 316                 | 52.10          | 5.18            | 24                       | -2.29 [54]                         | -1.39 [48]               | -2.49 [31]               |
|                             | Reading              | 353                 | 51.44          | -0.94           | 66                       | <sup>^</sup> 2.14 [112]            | 0.43 [46]                | 0.85 [33]                |
|                             | Andoya               | 476                 | 69.28          | 16.01           | 380                      | -1.03 [22]                         | -1.50 [33]               |                          |
|                             | Murcia               | 346                 | 38.00          | -1.16           | 69                       | -0.07 [54]                         |                          |                          |
|                             | Manchester           | 352                 | 53.47          | -2.23           | 76                       | -0.65 [47]                         | -0.47 [51]               | -1.78 [19]               |
|                             | La Coruña            | 405                 | 43.33          | -8.41           | 65                       | <sup>*</sup> -4.95 [25]            |                          |                          |
|                             | Zaragoza             | 411                 | 41.63          | -0.88           | 258                      | -0.37 [53]                         |                          |                          |
| Aosta                       | 479                  | 45.74               | 7.36           | 570             | <sup>^</sup> -0.73 [101] | -0.99 [46]                         | -1.24 [42]               |                          |
| Tamanrasset                 | 002                  | 22.78               | 5.52           | 1384            | -1.84 [54]               |                                    | -0.71 [45]               |                          |
| Marsa Matrüh                | 376                  | 31.33               | 27.22          | 35              | -2.41 [53]               |                                    |                          |                          |
| East Asia                   | Petaling Jaya        | 322                 | 3.10           | 101.65          | 86                       | <sup>^</sup> 1.58 [82]             |                          | 1.18 [45]                |
|                             | Pohang               | 332                 | 36.03          | 129.38          | 6                        | -0.66 [25]                         |                          |                          |
|                             | Minamitorishin       | 030                 | 24.29          | 153.98          | 9                        | -0.73 [55]                         | -1.29 [47]               | -0.40 [40]               |
|                             | Mt. Waliguan         | 295                 | 36.29          | 100.90          | 3810                     | <sup>*</sup> 7.36 [42]             | <sup>*</sup> 7.36 [42]   | <sup>*</sup> -4.06 [21]  |
|                             | Linan                | 325                 | 30.18          | 119.44          | 132                      |                                    | -1.87 [32]               | <sup>*</sup> -5.38 [26]  |
|                             | Longfengshan         | 326                 | 44.73          | 127.59          | 334                      |                                    | <sup>*</sup> 4.15 [48]   | <sup>*</sup> -21.47 [40] |
|                             | Lhasa                | 349                 | 29.67          | 91.13           | 3650                     |                                    | <sup>*</sup> 10.59 [48]  | 1.48 [41]                |
|                             | Songkhla             | 345                 | 7.20           | 100.60          | 12                       |                                    | -0.99 [30]               | -1.24 [37]               |
|                             | Bangna Bangkok       | 216                 | 13.67          | 100.62          | 60                       |                                    |                          | -2.20 [43]               |
| Anmyeon-do                  | 513                  | 36.54               | 126.33         | 57              | -0.87 [45]               |                                    |                          |                          |
| Other                       | Mauna Loa            | 031                 | 19.54          | -155.58         | 3397                     | 3.10 [53]                          | <sup>*</sup> 4.99 [47]   | <sup>^</sup> *5.08 [84]  |
|                             | Paramaribo           | 435                 | 5.81           | -55.22          | 16                       | -0.45 [52]                         | 0.08 [39]                | 0.84 [36]                |
|                             | Zhongshan            | 478                 | -69.37         | -76.38          | 11                       |                                    |                          | <sup>*</sup> -5.68 [51]  |
|                             | Amundsen-Scott       | 111                 | -90.00         | 70.24           | 3507                     |                                    |                          | -2.17 [55]               |
|                             | Marambio             | 233                 | -64.23         | -56.62          | 198                      | <sup>*</sup> -5.45 [13]            |                          | 0.67 [46]                |
| Punta Arenas                | 473                  | -53.14              | -70.85         | 0               | <sup>*</sup> -4.01 [42]  | 0.14 [38]                          | 0.17 [55]                |                          |

<sup>+</sup>World Meteorological Organization station identification number, <sup>^</sup>Multiple instruments

<sup>\*</sup>Identifies stations with outlier mean differences as either larger in size than 6 % or exceeding two standard deviations of the mean difference variability standard deviation over all remaining stations.

**Table S1.** List of time mean differences of total column ozone between OMI-TOMS and Brewer stations over July-August 2014/2015 and January-February 2015. The Bandung station, Indonesia, is not included as it was later found to have been assigned incorrect coordinates.

| Region                      | Station name     | WMO ID <sup>+</sup> | Latitude (deg) | Longitude (deg) | Elevation (m) | Mean differences (%) [# of points] |             |             |
|-----------------------------|------------------|---------------------|----------------|-----------------|---------------|------------------------------------|-------------|-------------|
|                             |                  |                     |                |                 |               | Summer 2014                        | Summer 2015 | Winter 2015 |
| North America and Greenland | Caribou          | 020                 | 46.87          | 68.03           | 192           |                                    | 1.32 [11]   |             |
|                             | Boulder          | 067                 | 40.01          | -105.25         | 1689          | -0.22 [35]                         | -1.03 [25]  | -0.25 [19]  |
|                             | Wallops          | 107                 | 37.93          | -75.48          | 13            | 0.26 [18]                          |             |             |
|                             | Mexico City      | 192                 | 19.33          | -99.18          | 2268          |                                    | *-7.57 [10] | *-4.67 [14] |
|                             | Barrow           | 199                 | 71.32          | -156.61         | 11            | -1.02 [13]                         | -1.16 [16]  |             |
|                             | La Habana        | 311                 | 23.14          | -82.34          | 50            | -1.43 [27]                         | -0.86 [5]   | 0.26 [12]   |
|                             | Hanford          | 341                 | 36.32          | -119.63         | 73            | -0.25 [32]                         |             | 0.72 [22]   |
| Europe and Africa           | Tamanrasset      | 002                 | 22.78          | 5.52            | 1382          | -2.12 [53]                         | -1.82 [49]  | -0.19 [46]  |
|                             | Haute Provence   | 040                 | 43.93          | 5.70            | 684           | 1.29 [27]                          | 1.85 [47]   |             |
|                             | Lerwick          | 043                 | 60.13          | -1.18           | 82            | 0.02 [12]                          |             |             |
|                             | Hradec Kralove   | 096                 | 50.18          | 15.84           | 285           | -0.74 [24]                         | -0.77 [25]  | 1.71 [6]    |
|                             | Hohenpeissenberg | 099                 | 47.81          | 11.01           | 975           | 0.13 [20]                          | 0.13 [30]   | 1.18 [18]   |
|                             | Fairbanks        | 105                 | 64.82          | -147.87         | 138           | -2.90 [14]                         |             |             |
|                             | Nashville        | 106                 | 36.25          | -86.57          | 182           | 0.22 [41]                          | -1.79 [23]  | 0.71 [23]   |
|                             | Biscarrosse      | 197                 | 46.77          | -100.76         | 511           |                                    | 0.56 [12]   | -0.55 [13]  |
|                             | Bucharest        | 226                 | 44.48          | 26.13           | 100           | -0.86 [11]                         | -0.22 [9]   | 0.99 [11]   |
|                             | Aswan            | 245                 | 23.97          | 32.78           | 190           | -1.32 [10]                         |             |             |
|                             | Vindeln          | 284                 | 64.24          | 19.77           | 225           |                                    | -1.19 [13]  |             |
|                             | Athens           | 293                 | 37.98          | 23.73           | 280           | 1.55 [38]                          | 1.64 [34]   |             |
|                             | Hurghada         | 409                 | 27.28          | 33.75           | 7             | -1.91 [50]                         |             |             |
| Amberd                      | 410              | 40.38               | 44.25          | 2070            | *6.70 [41]    |                                    |             |             |
| Kyiv-Goloseyev              | 498              | 50.36               | 30.50          | 206             | 0.18 [27]     | 1.46 [51]                          | 2.83 [18]   |             |
| East Asia                   | Sapporo          | 012                 | 43.06          | 141.33          | 26            | -0.52 [25]                         | 0.80 [13]   | 1.51 [11]   |
|                             | Tateno           | 014                 | 36.06          | 140.13          | 31            | 1.24 [22]                          | 1.78 [16]   | 0.03 [26]   |
|                             | Naha             | 190                 | 26.21          | 127.69          | 28            | 1.18 [22]                          | 2.72 [11]   | 1.12 [11]   |
|                             | Xhianghe         | 208                 | 39.75          | 116.96          | 29            | 0.01 [11]                          | -0.09 [5]   |             |
|                             | Kunming          | 209                 | 25.03          | 102.68          | 1891          | *-4.21 [10]                        |             |             |
|                             | Bangna Bangkok   | 216                 | 13.67          | 100.61          | 53            | -2.43 [2]                          | -2.92 [2]   | -2.48 [1]   |
| Other                       | Mauna Loa        | 031                 | 19.53          | -155.58         | 3400          | <sup>^</sup> 3.16 [62]             | 0.75 [12]   | 1.92 [27]   |
|                             | Buenos Aires     | 091                 | -34.58         | -58.48          | 25            | -0.37 [46]                         |             |             |
|                             | Syowa            | 101                 | -69.01         | 39.58           | 22            | -3.37 [2]                          | *-4.27 [2]  | -0.13 [22]  |
|                             | Amundsen-Scott   | 111                 | -89.98         | -24.80          | 2810          |                                    |             | -1.34 [43]  |
|                             | Perith           | 159                 | -31.92         | 115.96          | 2             | 0.83 [19]                          | -0.84 [13]  | -1.33 [29]  |
|                             | Cachoeira        | 200                 | -22.69         | -45.01          | 574           | -2.27 [14]                         | -2.08 [31]  | *-5.44 [28] |
|                             | Natal            | 219                 | -5.84          | -35.21          | 49            |                                    | -0.64 [26]  | -1.71 [23]  |
|                             | Marambio         | 233                 | -64.23         | -56.62          | 198           | -3.30 [4]                          |             | 1.74 [37]   |
|                             | Lauder           | 256                 | -45.04         | 169.68          | 370           | 0.06 [18]                          | -0.27 [15]  | 0.53 [18]   |
|                             | Ushuaia          | 339                 | -54.85         | -68.31          | 17            | -1.64 [35]                         | -0.96 [41]  | -0.83 [46]  |
|                             | Comodoro         | 342                 | -45.78         | -67.50          | 46            | -0.61 [32]                         | -1.32 [42]  | 1.46 [43]   |
|                             | La Quiaca        | 513                 | -22.11         | -65.44          | 3459          |                                    | -0.70 [52]  |             |

<sup>+</sup> World Meteorological Organization station identification number, <sup>^</sup>Multiple instruments

\*Identifies stations with outlier mean differences as either larger in size than 6 % or exceeding two standard deviations of the mean difference variability standard deviation over all remaining stations.

**Table S2.** List of time mean differences of total column ozone between OMI-TOMS and Dobson stations over July-August 2014/2015 and January-February 2015. The Dobson total column ozone measurements for the two summer periods were adjusted according to the bias correction as a function of the ozone effective temperature. Those for the winter period were not adjusted in the absence of the ozone effective temperature for the period. The impacts of the corrections on the mean differences for the Dobson summer periods were reductions between 0.0 and 0.4 %. The Samoa station, which is part of the WOUDC network, is not included as we had associated incorrect coordinates to it.

| Region       | Station name    | WMO ID <sup>+</sup> | Latitude<br>(deg) | Longitude<br>(deg) | Elevation<br>(m) | Mean differences (%) [# of points] |                |                |
|--------------|-----------------|---------------------|-------------------|--------------------|------------------|------------------------------------|----------------|----------------|
|              |                 |                     |                   |                    |                  | Summer<br>2014                     | Summer<br>2015 | Winter<br>2015 |
| Russia       | Almaty          | 003                 | 43.14             | 76.56              | 847              | -0.46 [5]                          | -3.04 [13]     |                |
|              | Vladivostok     | 016                 | 43.12             | 131.90             | 138              |                                    | -1.33 [4]      | -2.06 [2]      |
|              | St. Pertersburg | 042                 | 59.95             | 30.70              | 74               | -2.09 [6]                          | *-3.61 [5]     |                |
|              | Bolshaya Elan   | 112                 | 46.95             | 142.70             | 22               |                                    | -1.60 [1]      |                |
|              | Samara          | 115                 | 53.25             | 50.22              | 139              | 1.34 [13]                          | 2.61 [9]       |                |
|              | Moscow          | 116                 | 55.75             | 37.57              | 187              | 0.56 [4]                           |                |                |
|              | Murmansk        | 117                 | 68.97             | 33.05              | 46               | -1.75 [10]                         | -0.42 [9]      |                |
|              | Nagaev          | 118                 | 59.55             | 150.78             | 115              | 1.00 [2]                           | 0.78 [2]       |                |
|              | Omsk            | 120                 | 55.02             | 73.38              | 100              | -2.24 [8]                          | -1.71 [7]      |                |
|              | Yekaterinburg   | 122                 | 56.73             | 61.07              | 300              | -2.91 [2]                          | 0.55 [7]       |                |
|              | Yakutsk         | 123                 | 62.02             | 129.72             | 100              | -1.26 [3]                          | -1.04 [3]      |                |
|              | Pechora         | 129                 | 65.12             | 57.10              | 61               | -2.47 [8]                          |                |                |
|              | Petropavko      | 130                 | 53.08             | 158.55             | 78               | 0.62 [10]                          | 0.83 [10]      | -0.14 [5]      |
|              | Turuhansk       | 142                 | 65.47             | 87.56              | 0                |                                    | -2.41 [4]      |                |
|              | Krasnoyars      | 143                 | 56.00             | 92.88              | 277              | -2.09 [1]                          | -1.60 [4]      |                |
|              | Vitim           | 148                 | 59.45             | 112.58             | 200              | -1.28 [3]                          | -1.36 [4]      |                |
|              | Hanty-Mansijsk  | 150                 | 60.97             | 69.00              | 40               | -0.42 [3]                          |                |                |
|              | Atiray          | 183                 | 47.07             | 51.53              | 24               |                                    | -0.57 [1]      |                |
|              | Tiksi           | 186                 | 71.58             | 128.90             | 0                | 2.03 [1]                           |                |                |
| Arkhangel'sk | 271             | 64.55               | 40.58             | 0                  | -1.07 [22]       | *-4.32 [14]                        |                |                |

<sup>+</sup> World Meteorological Organization station identification number

**Table S3.** List of time mean differences of total column ozone between OMI-TOMS and filter ozonometer stations over July-August 2014/2015 and January-February 2015.

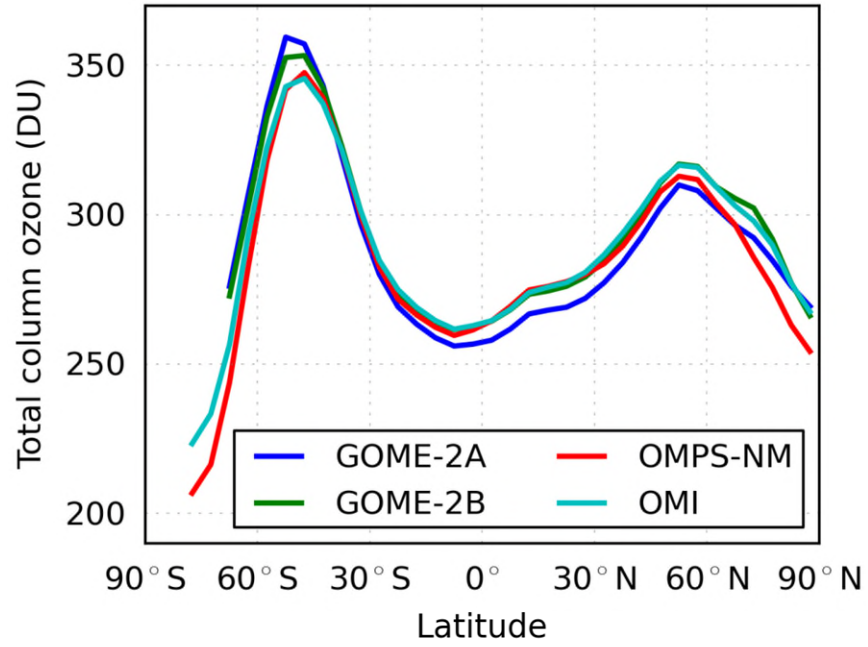

**Figure S1.** Total column ozone zonal means (DU) as a function of latitude (degrees), using 5° bins, for August 2014. The plot shows average latitudinal differences between instruments and allows for an approximate conversion between percentage and absolute differences.

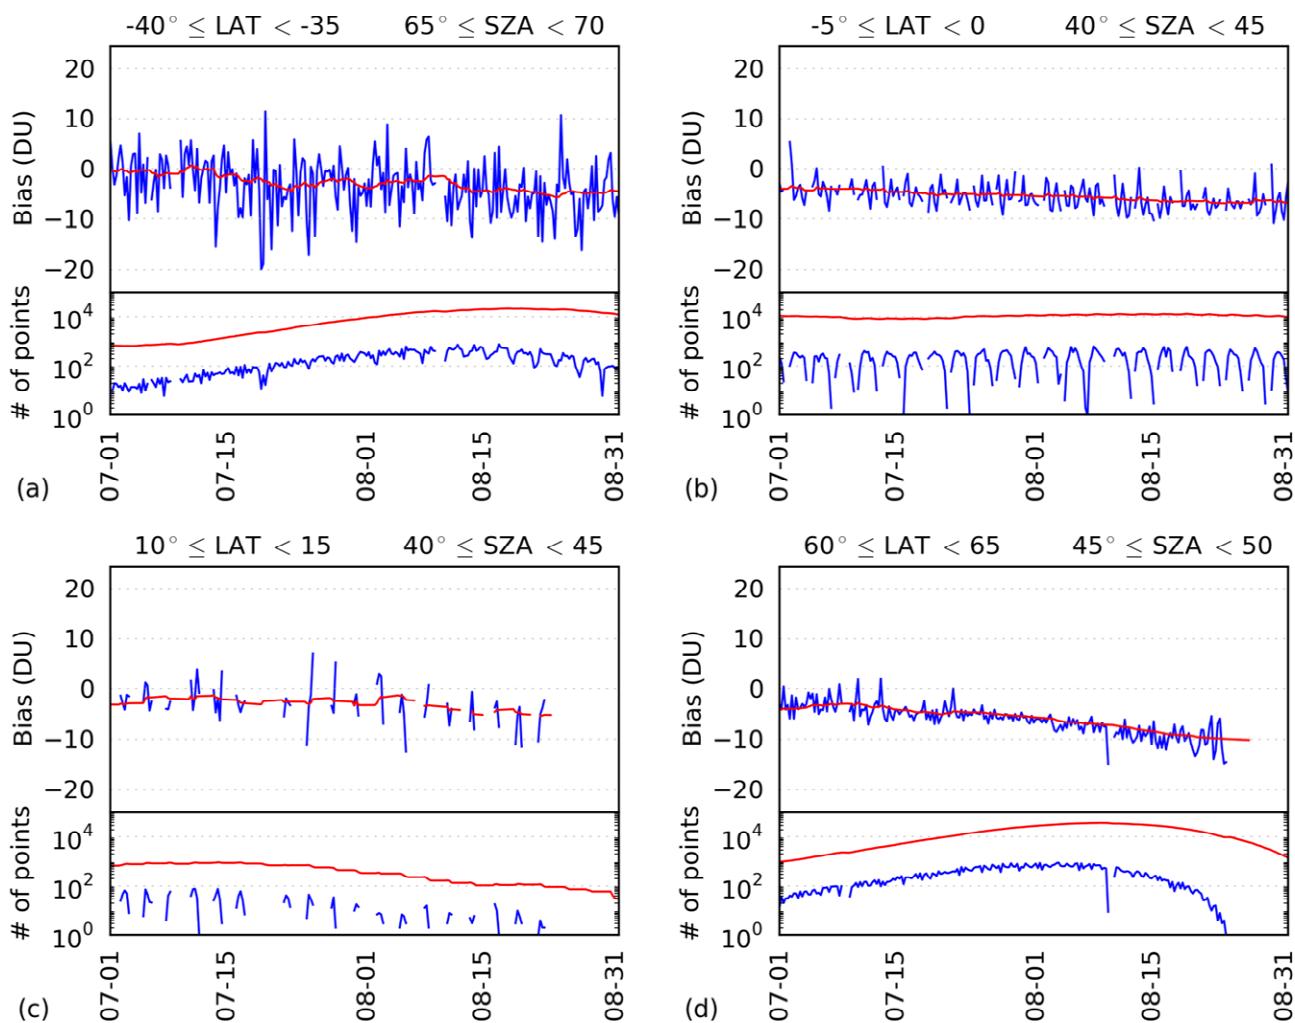

**Figure S2.** Time series of bias corrections (DU) for GOME-2A, corrected relative to OMI-TOMS, for July and August 2014 for selected latitude/solar zenith angle bins. Panels (a) to (d) show the bias correction for the (latitude, solar zenith angle) bins centred on  $(37.5^{\circ}\text{S}, 67.5^{\circ})$ ,  $(2.5^{\circ}\text{S}, 42.5^{\circ})$ ,  $(12.5^{\circ}\text{N}, 42.5^{\circ})$ , and  $(62.5^{\circ}\text{N}, 47.5^{\circ})$ , respectively, with a  $5^{\circ}$  bin width for both the latitude and solar zenith angle. In each panel, the top plot shows the biases and the bottom shows the number of points. The blue lines show individual mean differences from observations gathered in each six-hour time window from which the bias correction is derived. The red lines show the 2 week moving average bias correction. A gap in the curves denote no data available at that time.



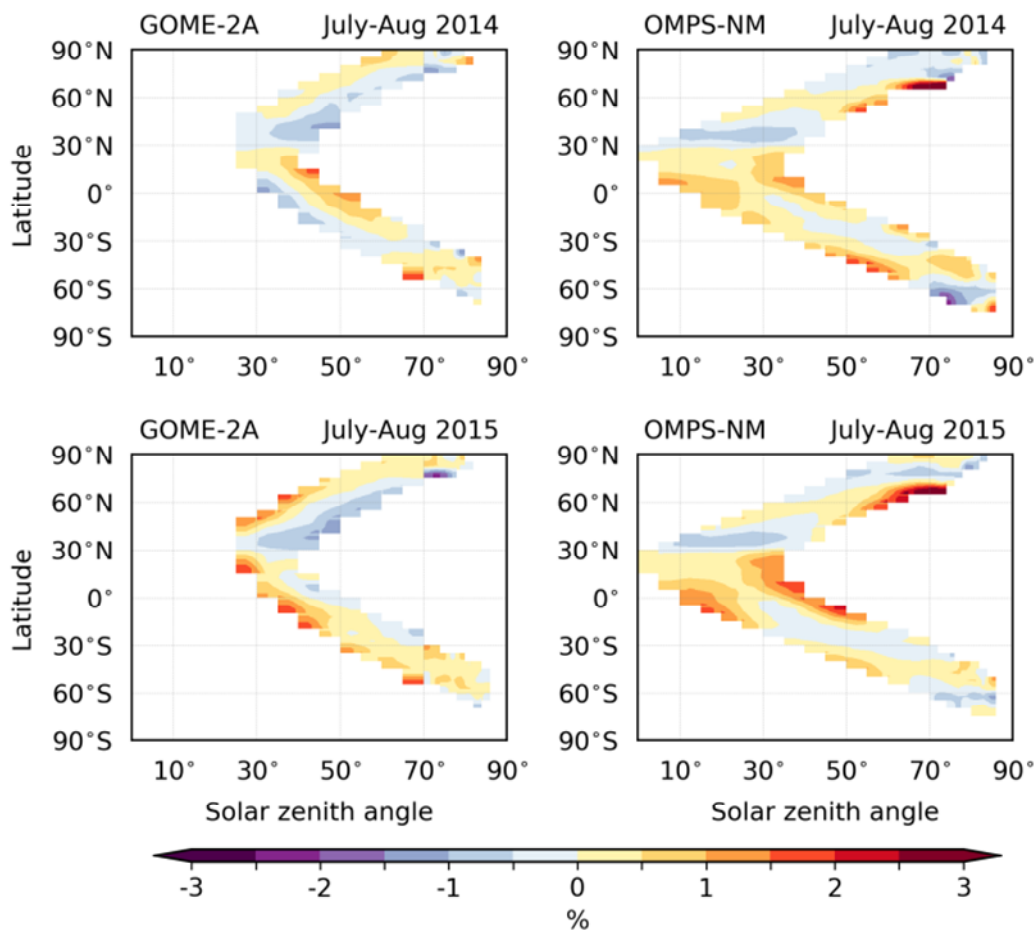

**Figure S3.** Residual average total column ozone differences (%) between GOME-2A, OMPS-NM and colocated OMI-TOMS data as a function of latitude (degrees) and solar zenith angle (degrees) for July-August 2014 and July-August 2015 following bias correction as a function of ozone effective temperature and solar zenith angle. The colours blue to purple denote negative differences and the colours yellow to red refer to positive differences.

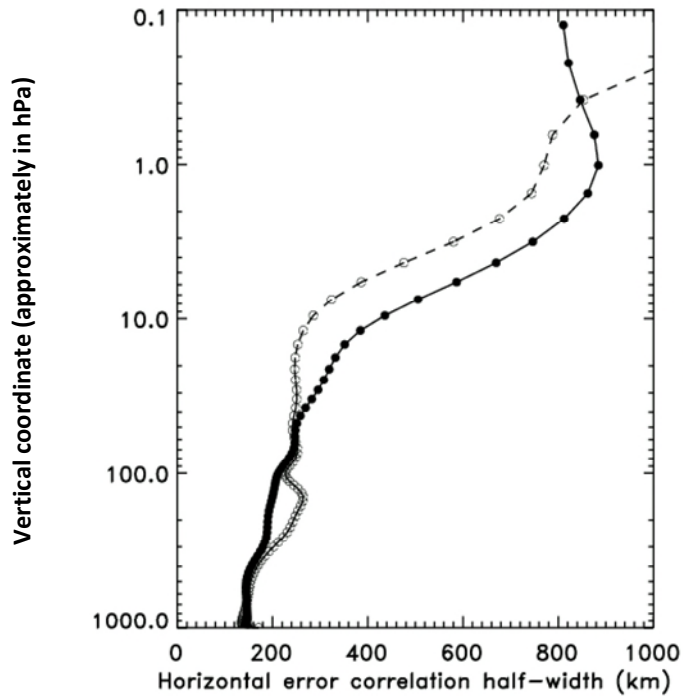

**Figure S4.** Half-width at half-maximum (HWHM) values for the third order autoregressive (TOAR) correlation model representing the horizontal ozone forecast error correlations derived from 48-24hr forecast differences (dashed) and 6hr time differences of the free running LINOZ ozone model (solid). The vertical axis denotes the analysis grid vertical coordinate times 1000 and can be taken as approximately equal to pressure (hPa) for a surface pressure at sea level. The shapes of the original correlation functions from these two types of differences somewhat differ.

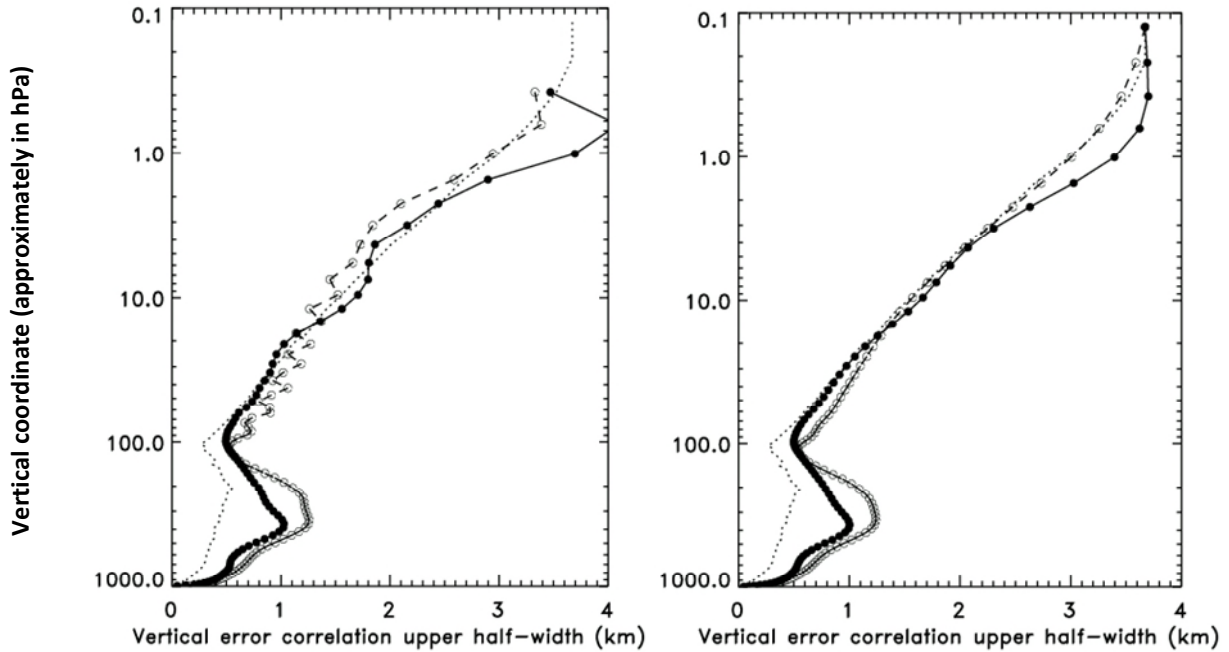

**Figure S5.** Upper half-width at half-maximum (HWHM) values for the third order autoregressive correlation model representing the vertical ozone forecast error correlations derived from 24-48hr forecast differences (dashed) and 6hr time differences of the free running LINOZ ozone model (solid). The dashed curve presents the approximate local vertical model resolution for the version of the model for which the correlations were derived. The vertical axis denotes the analysis grid vertical coordinate times 1000 and can be taken as approximately equal to pressure (hPa) for a surface pressure at sea level. The curves on the left panel show the initially obtained values and those on the right panel are the final values after imposing lower limits equal to separation between adjacent levels and localized vertical filtering. The vertical correlation HWHM were derived from the logarithm of the vertical coordinate and, for plotting purposes only, approximately converted to kilometers using the ideal gas law and an isothermal temperature of 220 Kelvin.
